# Supplementary material for: Garnet-structured persistent luminescence phosphor Ca3Al2Ge3O12:Cr3+ for dynamic anticounterfeiting applications
Source: Royal Society of Chemistry journal article supplement (doi:10.1039/d2dt01617f), 2022-01-01
Supplement: d2dt01617f1.pdf [file d2dt01617f1.pdf]

Fig. S1 Structure and Rietveld refinement results of CAG: $x\text{Cr}^{3+}$  with (a)  $x=2\%$ , (b)  $x=4\%$ , (c)  $x=6\%$  and (d)  $x=7\%$

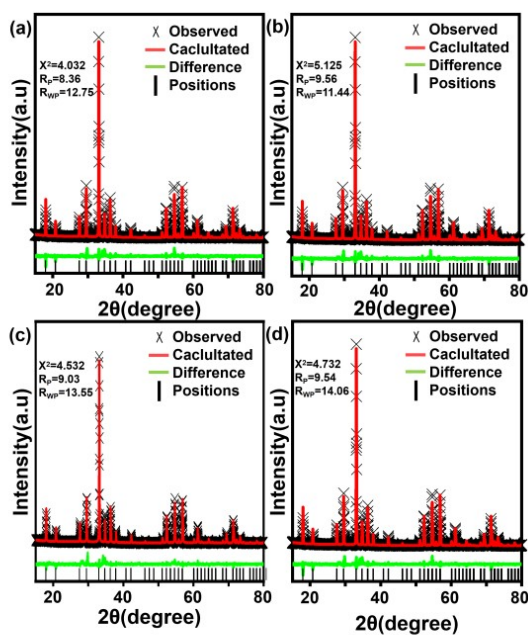

Fig. S2 The excitation spectra of CAG: $x\text{Cr}^{3+}$  ( $\lambda_{em}=722\text{nm}$ ) (Response to Reviewer 1's question 1).

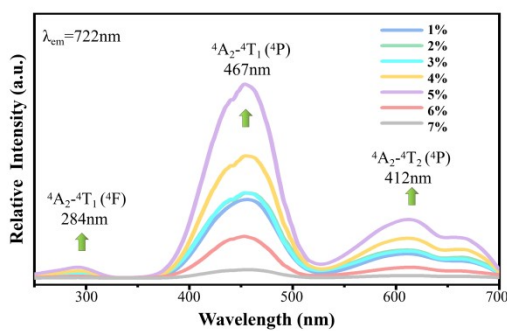

Fig. S3 The emission spectra of CAG: $x\text{Cr}^{3+}$  ( $\lambda_{\text{ex}}=467\text{ nm}$ ). +

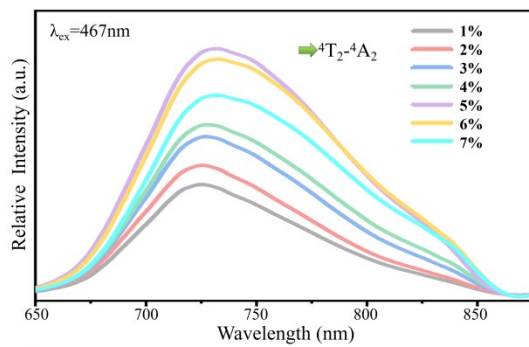

Fig. S4 The emission spectra of CAG:2% $\text{Cr}^{3+}$  at 4K and 300K.

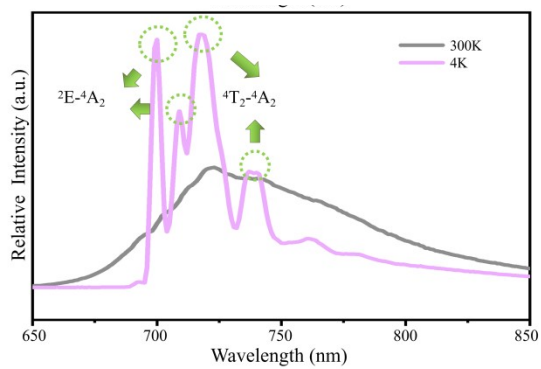

Fig. S5 The lifetime decay curves of CAG: 2%Cr<sup>3+</sup> monitoring the emission at 700 nm, 709 nm, 728 nm and 743 nm respectively under the excitation of 480 nm. (Response to Reviewer 3 's question 6)

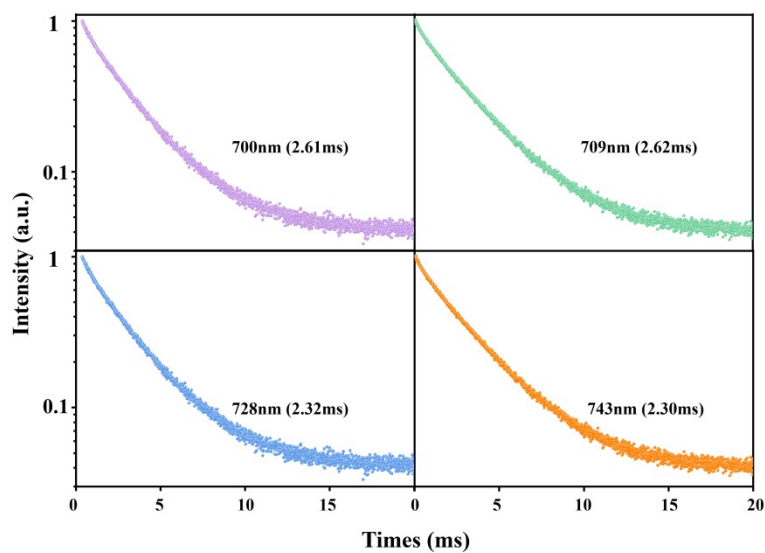

Fig. S6 Long persistent luminescence (LPL) spectra of CAG:xCr<sup>3+</sup> (x=1%-7%).

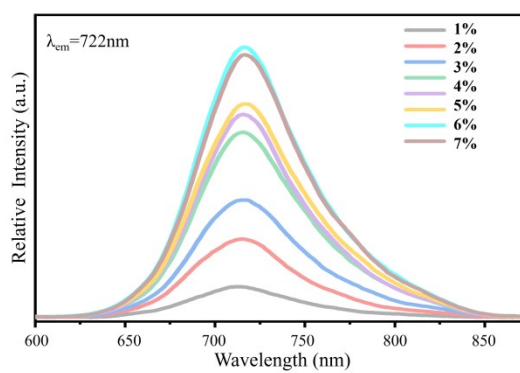

Fig. S7 Comparison with a typical phosphor ( $\text{SrAl}_2\text{O}_4:\text{Eu,Dy}$ ,  $\text{Sr}_2\text{MgSi}_2\text{O}_7:\text{Eu,Dy}$ ,  $\text{Sr}_{0.7}\text{Ca}_{0.25}\text{S}:\text{Eu}$ ) showing persistent luminescence comparison of emission and emission spectra, e.g., after 30s. **(Response to Reviewer 3 's question 1)**

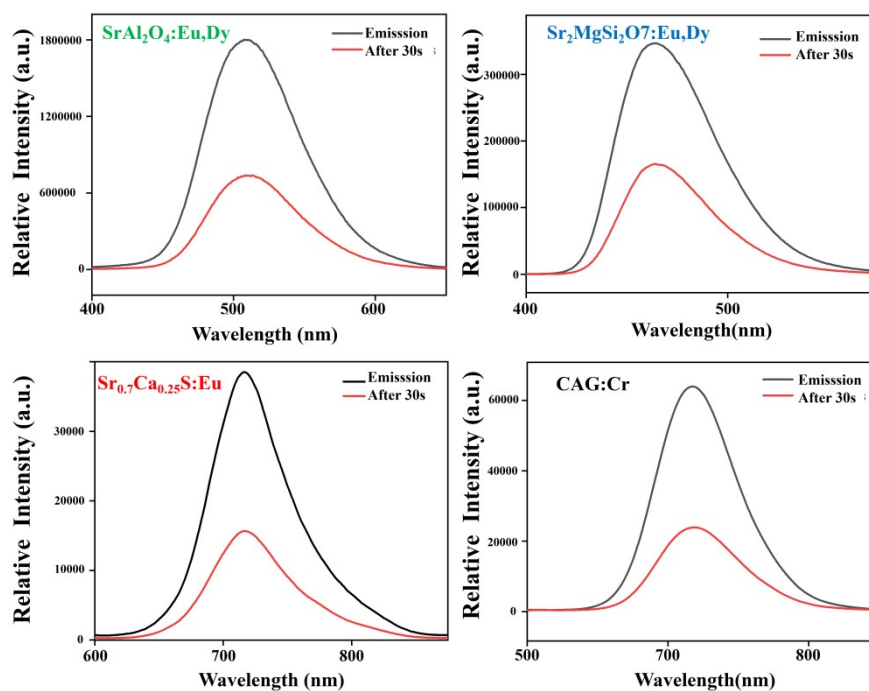

Fig. S8 Afterglow intensity of  $\text{CAG}:\text{xCr}^{3+}$  ( $x = 2\%$ ,  $6\%$ ) under UV radiation after 5 min as a function of time. **(Response to Reviewer 3 's question 1)**

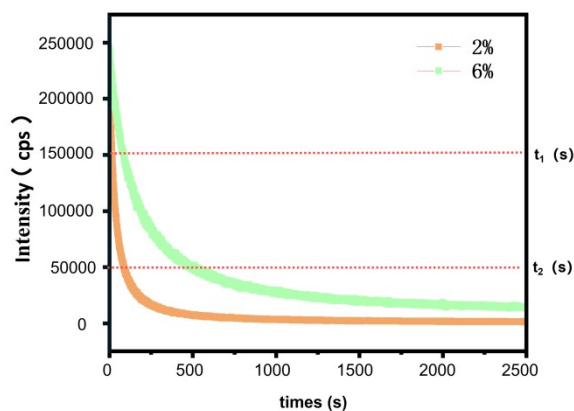

Fig. S9 Calculated and analytical results for the band gap of CAG:  $x\text{Cr}^{3+}$  ( $x = 3\%$  to  $7\%$ ).

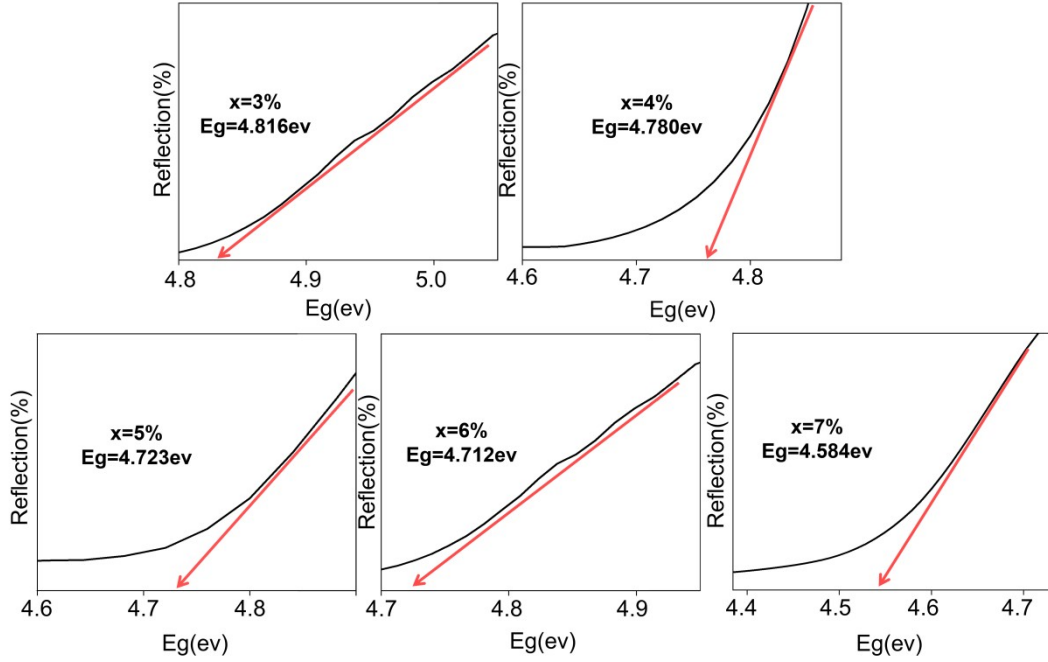

Table S1 CAG: $x\text{Cr}^{3+}$  decay time parameters 1 and 2 and the corresponding standard deviation.

|                                                                                    | concentration | $\tau_1$ (s) | Standard Deviation | $\tau_2$ (s) | Standard Deviation |
|------------------------------------------------------------------------------------|---------------|--------------|--------------------|--------------|--------------------|
| <b><math>\text{Ca}_3\text{Al}_2\text{Ge}_3\text{O}_{12}:x\text{Cr}^{3+}</math></b> | $x=1\%$       | 16.92618     | 0.03693            | 114.24682    | 0.34807            |
|                                                                                    | $x=2\%$       | 17.70529     | 0.03676            | 126.62225    | 0.33975            |
|                                                                                    | $x=3\%$       | 16.15579     | 0.02412            | 109.75118    | 0.219              |
|                                                                                    | $x=4\%$       | 14.2773      | 0.01843            | 99.24778     | 0.16131            |
|                                                                                    | $x=5\%$       | 13.24918     | 0.06506            | 87.05239     | 0.50453            |
|                                                                                    | $x=6\%$       | 12.09573     | 0.05147            | 63.96253     | 0.39145            |
|                                                                                    | $x=7\%$       | 10.63198     | 0.04842            | 59.28366     | 0.36929            |

Table S2 Comparison table with commercial powder attenuation difference.

| <b>Samples</b>                                                                   | <b>Emission Peak Intensity(a.u.)</b> | <b>After 30s Emission Peak Intensity(a.u.)</b> | <b>Decay multiplier</b> |
|----------------------------------------------------------------------------------|--------------------------------------|------------------------------------------------|-------------------------|
| <b>SrAl<sub>2</sub>O<sub>4</sub>:Eu,Dy</b>                                       | 1800530                              | 733571                                         | 2.454                   |
| <b>Sr<sub>2</sub>MgSi<sub>2</sub>O<sub>7</sub>:Eu,Dy</b>                         | 3121190                              | 1484710                                        | 2.102                   |
| <b>Sr<sub>0.7</sub>Ca<sub>0.25</sub>S:Eu</b>                                     | 38347                                | 14329                                          | 2.676                   |
| <b>Ca<sub>3</sub>Al<sub>2</sub>Ge<sub>3</sub>O<sub>12</sub>:2%Cr<sup>3</sup></b> | 70700                                | 29438                                          | 2.231                   |
